# Supplementary material
Source: HighWire-hosted journal article supplement (https://cmaj.ca/highwire/filestream/58662/field_highwire_adjunct_files/0/image-dong-1-at.pdf)

Appendix 1: (A) Lips of a 60-year-old woman showing widespread diffuse pigmentation on the inner aspects. (B) Pigmentation on the hard palate.

A

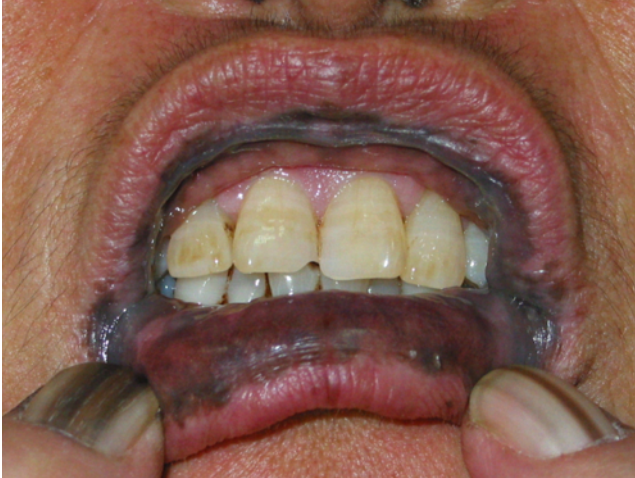

B

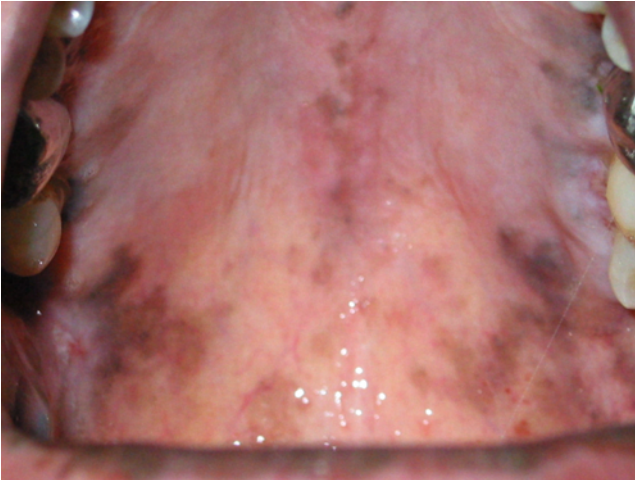

Supplement: image-dong-1-at.pdf [file image-dong-1-at.pdf]
